# Supplementary material
Source: PubMed Central journal article supplement (PMC6964269)
Supplement: ao9b02746_si_001.pdf [file ao9b02746_si_001.pdf]

**Identification of Xanthonenes from Mangosteen Pericarp that Inhibit the Growth of  
*Ralstonia solanacearum***

Ping Li,<sup>†</sup> Zhongyan Yang,<sup>†</sup> Bolin Tang,<sup>†</sup> Qian Zhang,<sup>†</sup> Zepeng Chen,<sup>‡</sup> Jili Zhang,<sup>§</sup> Jianyu Wei,<sup>§</sup> Lirong Sun,<sup>\*,‡</sup> and Jian Yan<sup>\*,†</sup>

<sup>†</sup>Key Laboratory of Agro-Environment in the Tropics, Ministry of Agriculture and Rural Affairs; Guangdong Provincial Key Laboratory of Eco-Circular Agriculture; Guangdong Engineering Research Centre for Modern Eco-Agriculture; College of Natural Resources and Environment, South China Agricultural University, Guangzhou, 510642, People's Republic of China

<sup>‡</sup> Department of Neurobiology, School of Basic Medical Sciences, Southern Medical University, Guangzhou, 510515, People's Republic of China

<sup>§</sup>China Tobacco Guangxi Industrial Co. Ltd., Nanning, Guangxi, People's Republic of China

<sup>‡</sup>Guangdong Provincial Tobacco Monopoly Administration, Guangzhou, Guangdong, People's Republic of China

Corresponding Author

\* Lirong Sun, Phone: +86-20-6278-9020 (L.R.S.). E-mail: slr0807@fimmu.com (L.R.S.).

\* Jian Yan, Phone: +86-20-3834-8099 (J.Y.), E-mail: yanjian78@scau.edu.cn (J.Y.).

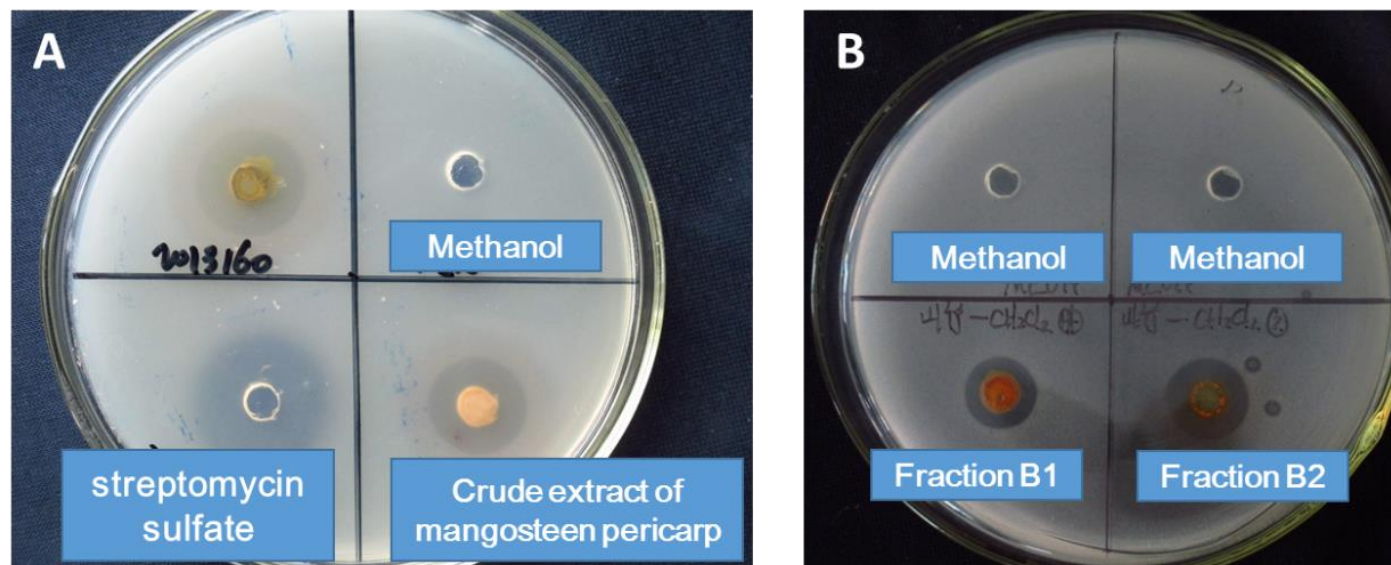

Figure S1. The anti-bacterial activity of crude extract of mangosteen pericarp on agar medium against *R. solanacearum*(A). The anti-bacterial activity of dichloromethane fractions (Fractions B1 and B2) isolated from crude extract of mangosteen pericarp (B). Streptomycin sulfate as positive control and methanol as negative control.

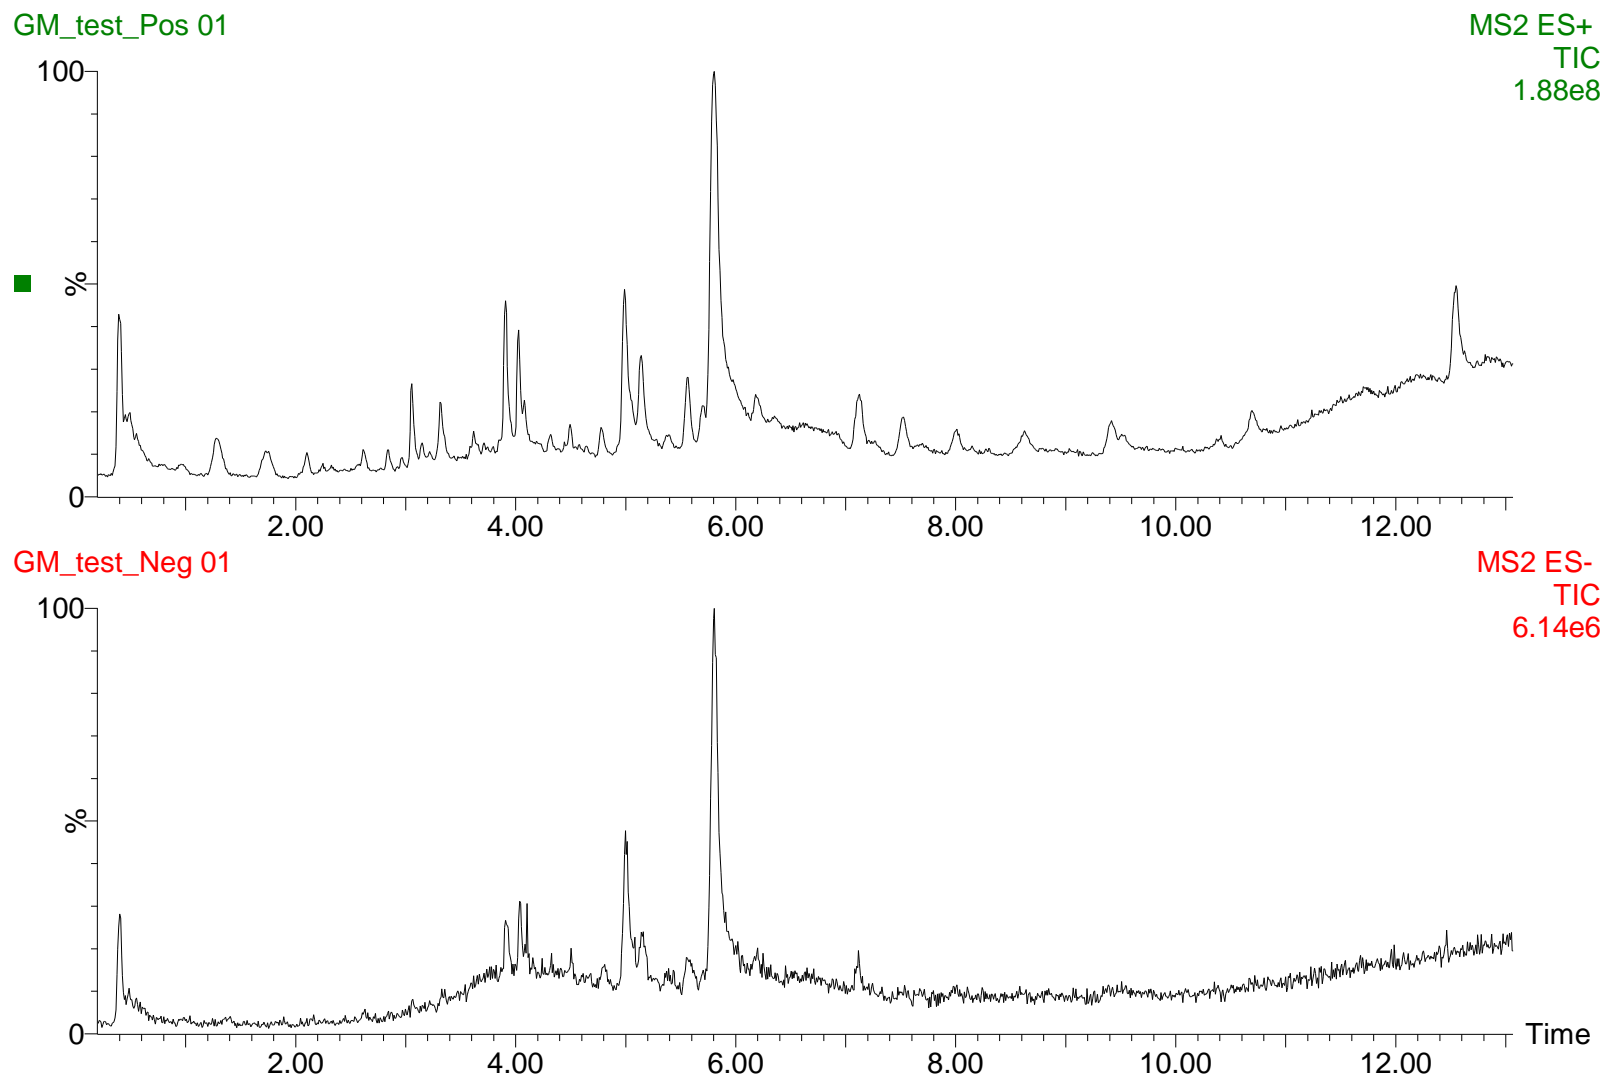

Figure S2. Total ion chromatograph (TIC) of crude extract of mangosteen pericarp at both positive and negative mode.

A

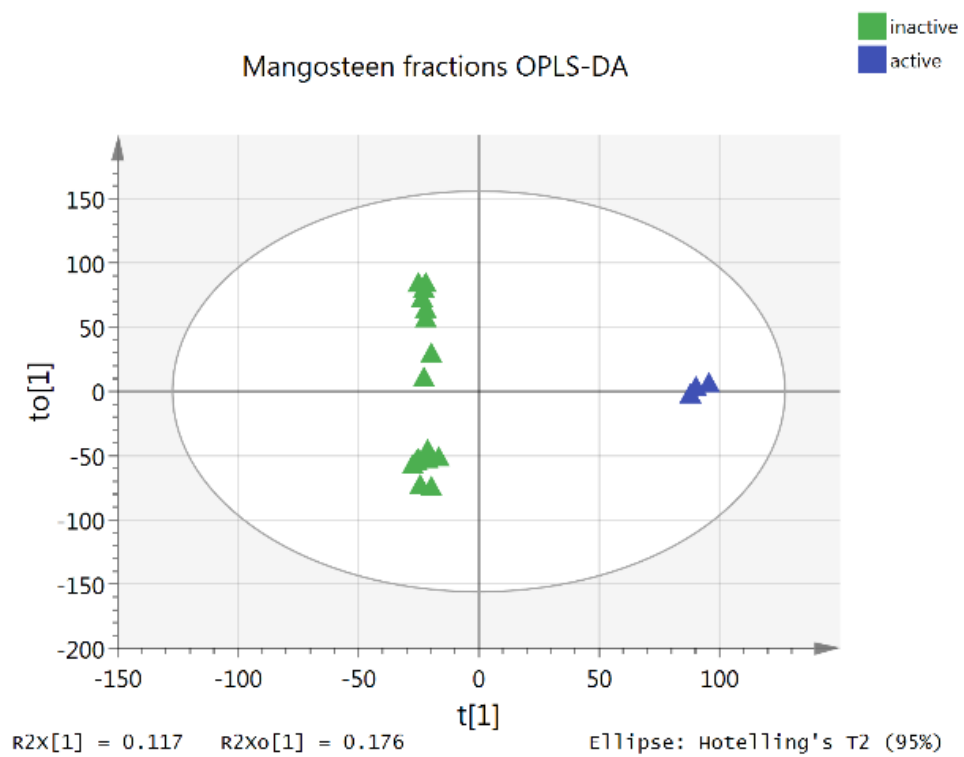

B

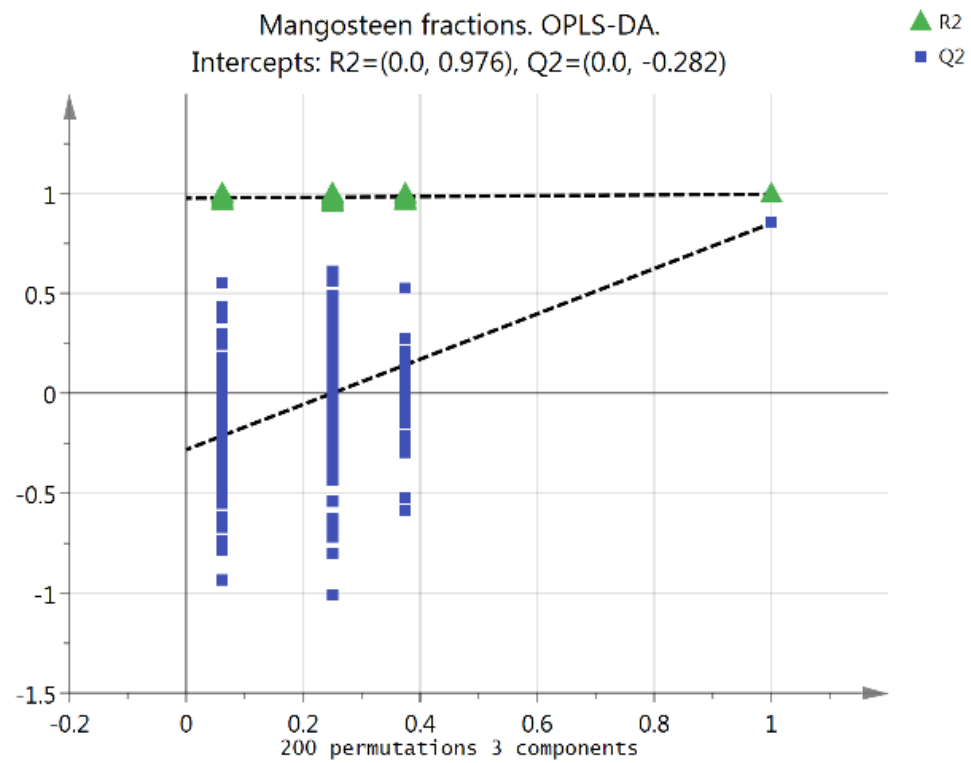

Figure S3. OPLS-DA scores plots of inactive and active fractions (A) and permutation test for the OPLS-DA models (B).

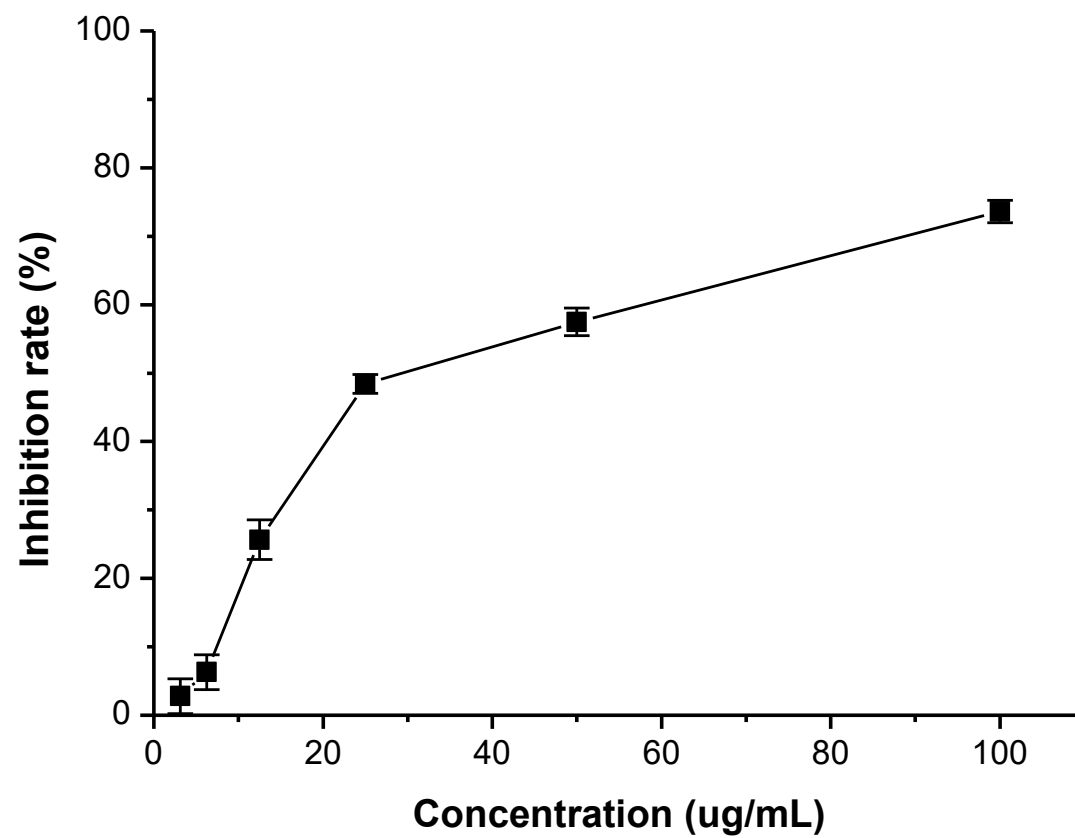

Figure S4. Inhibition Effect of  $\gamma$ -mangostin against *R. solanacearum*.

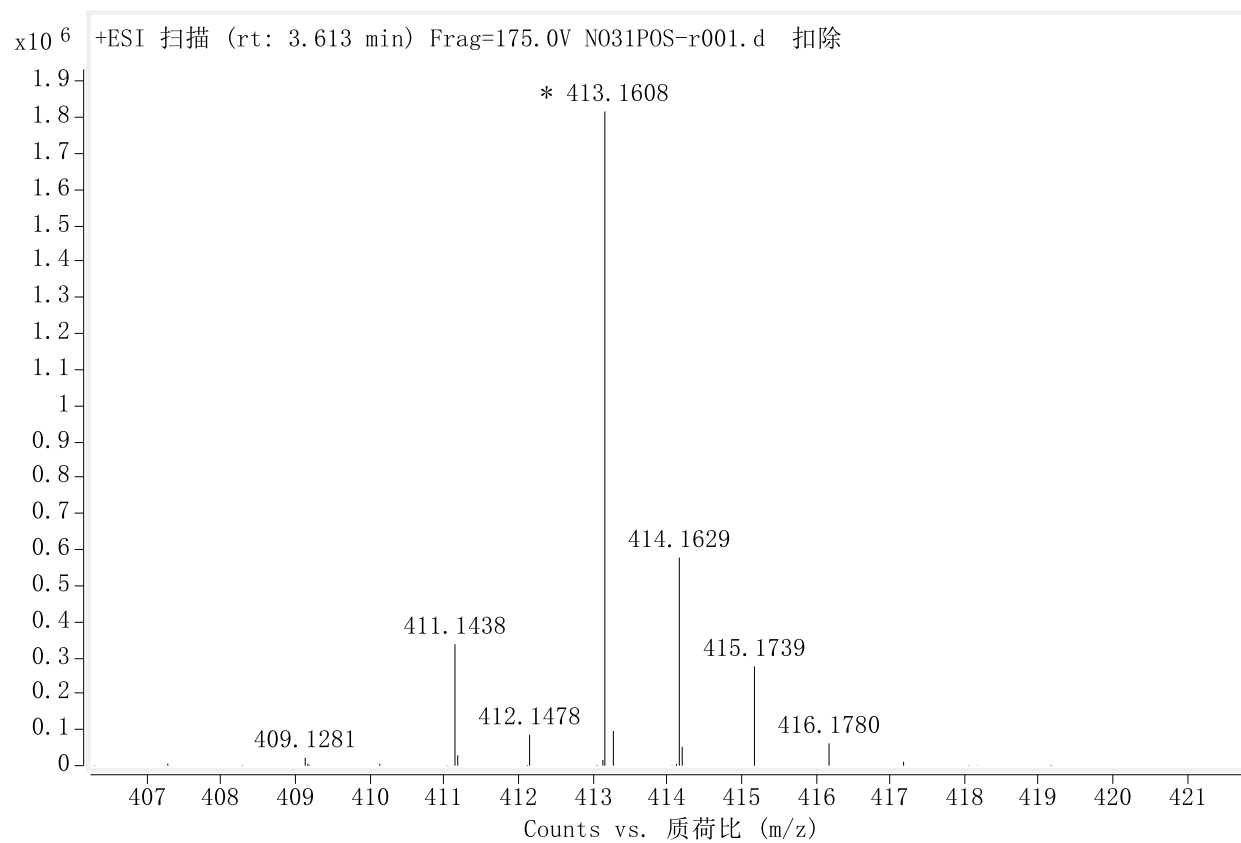

Figure S5. HR-MS of compound **5**

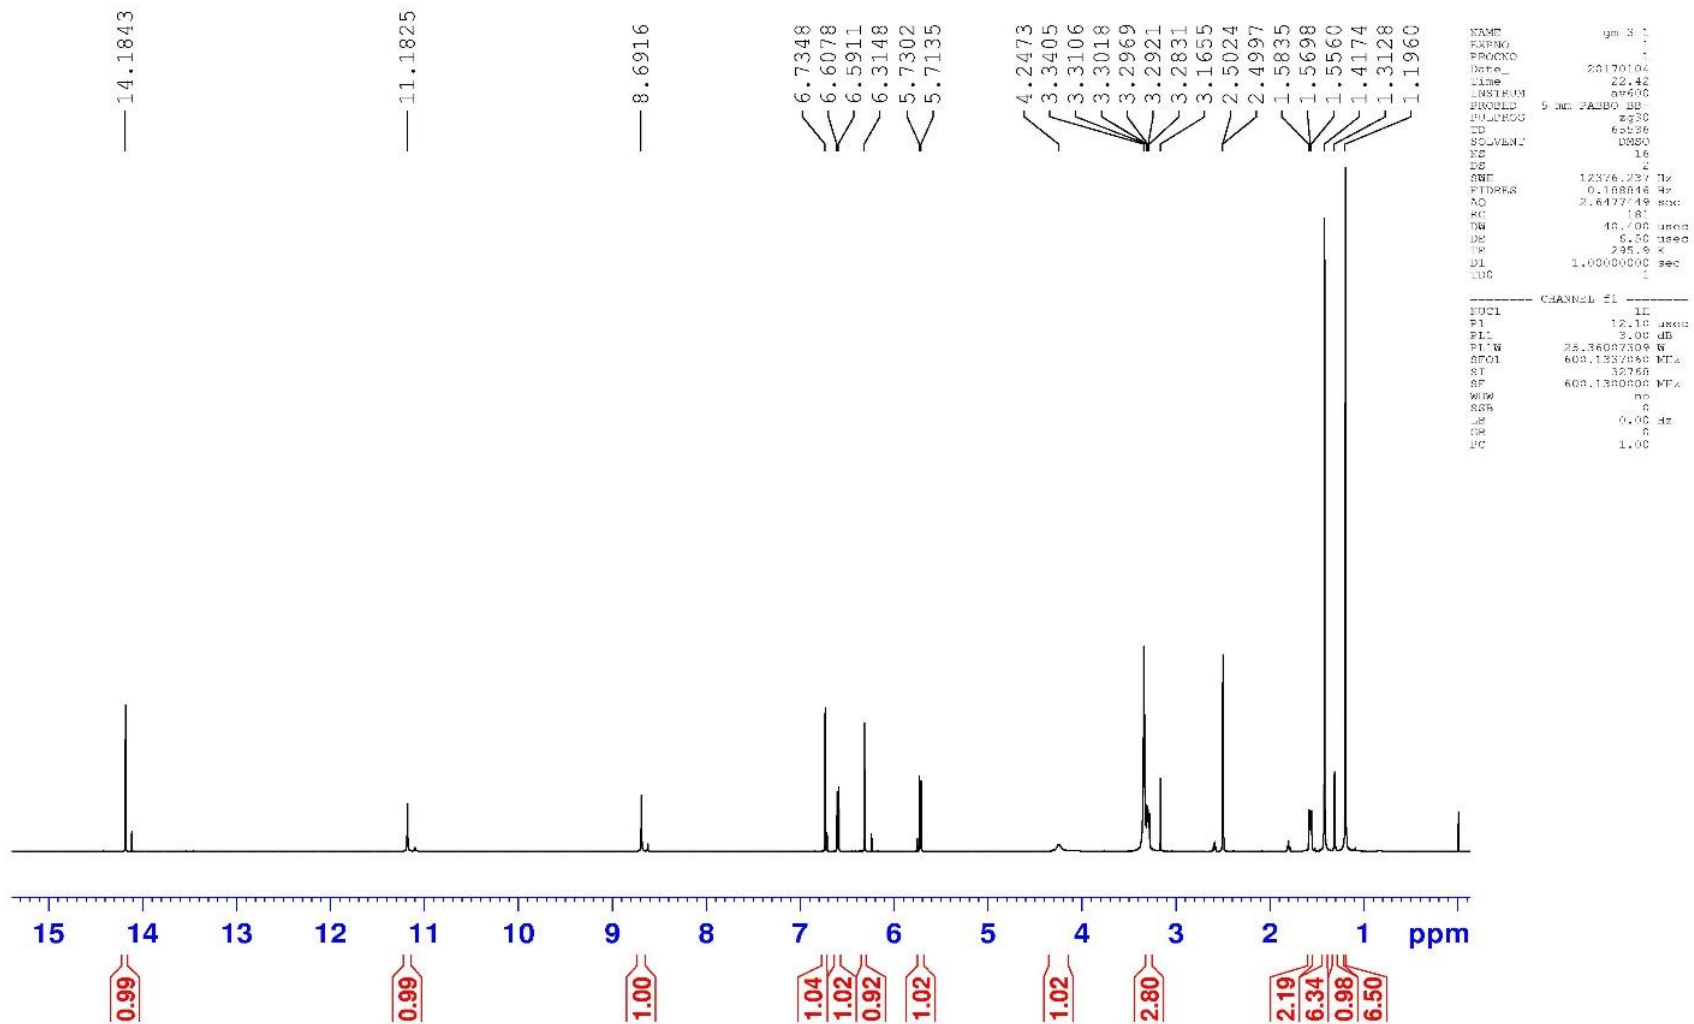

Figure S6. <sup>1</sup>H NMR of compound **5**.

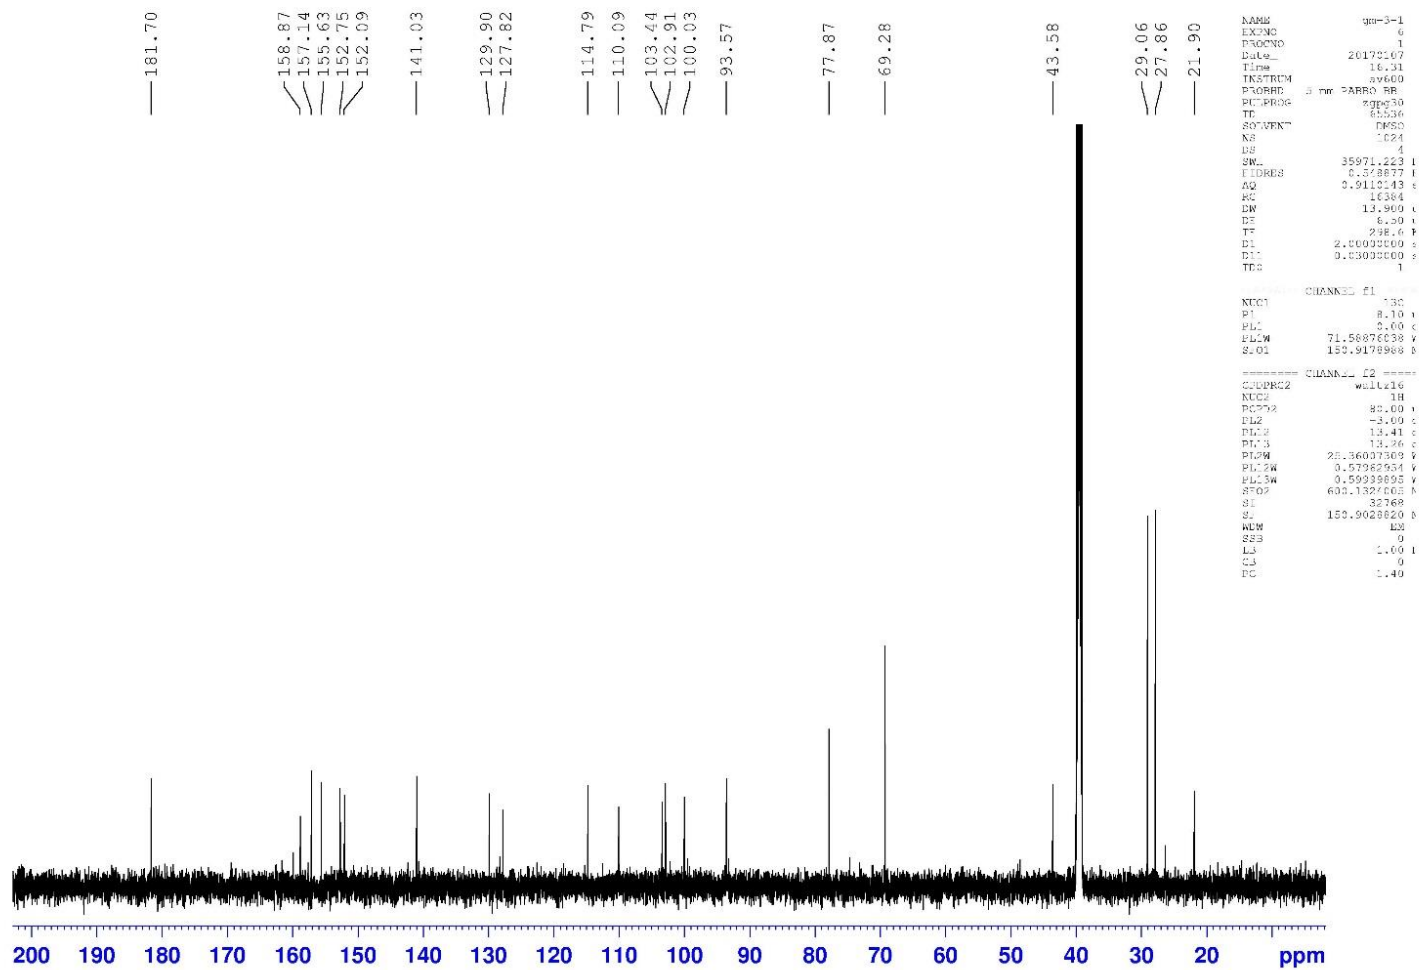

Figure S7.  $^{13}\text{C}$  NMR of compound 5.



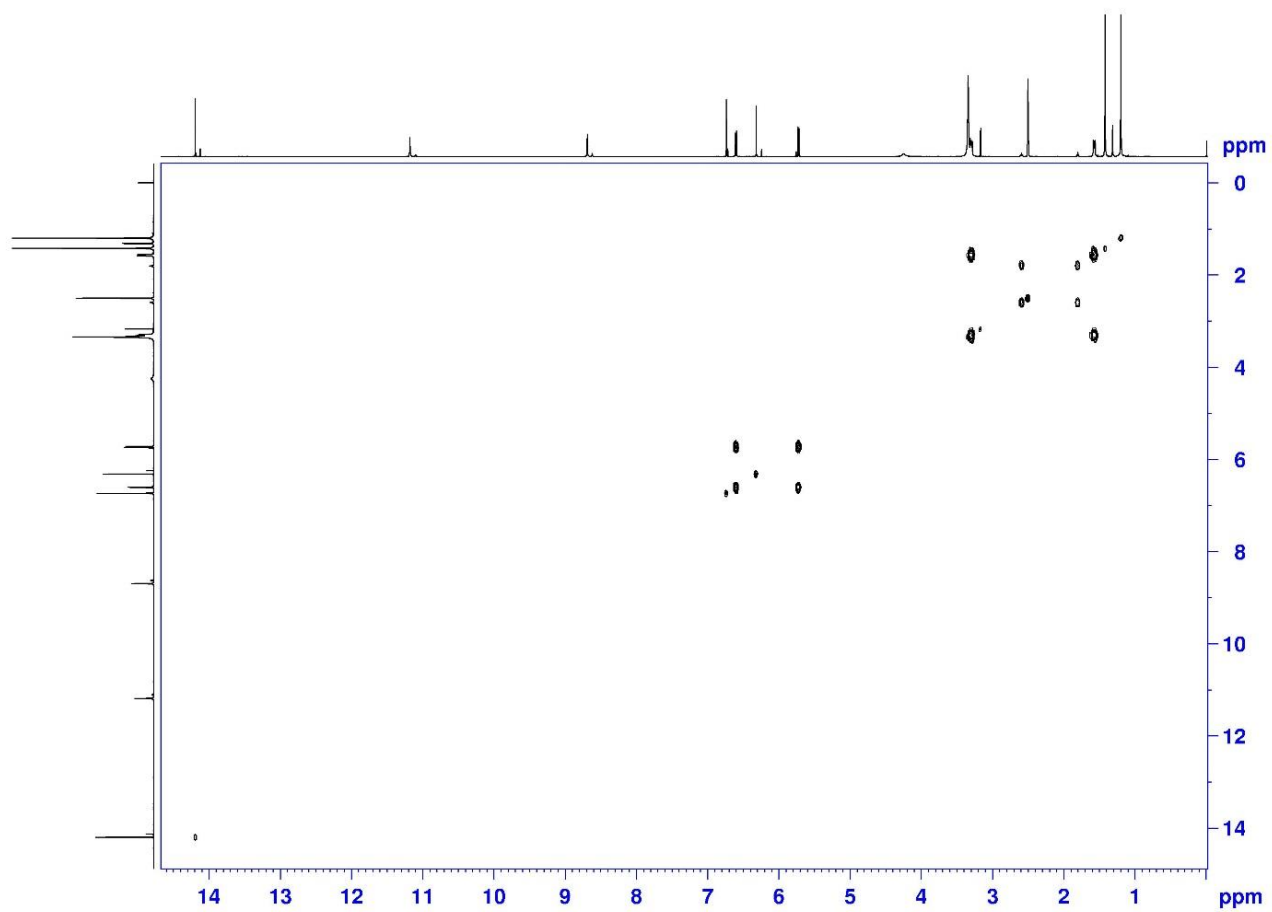

Figure S8.  $^1\text{H}$ - $^1\text{H}$  COSY of compound 5.

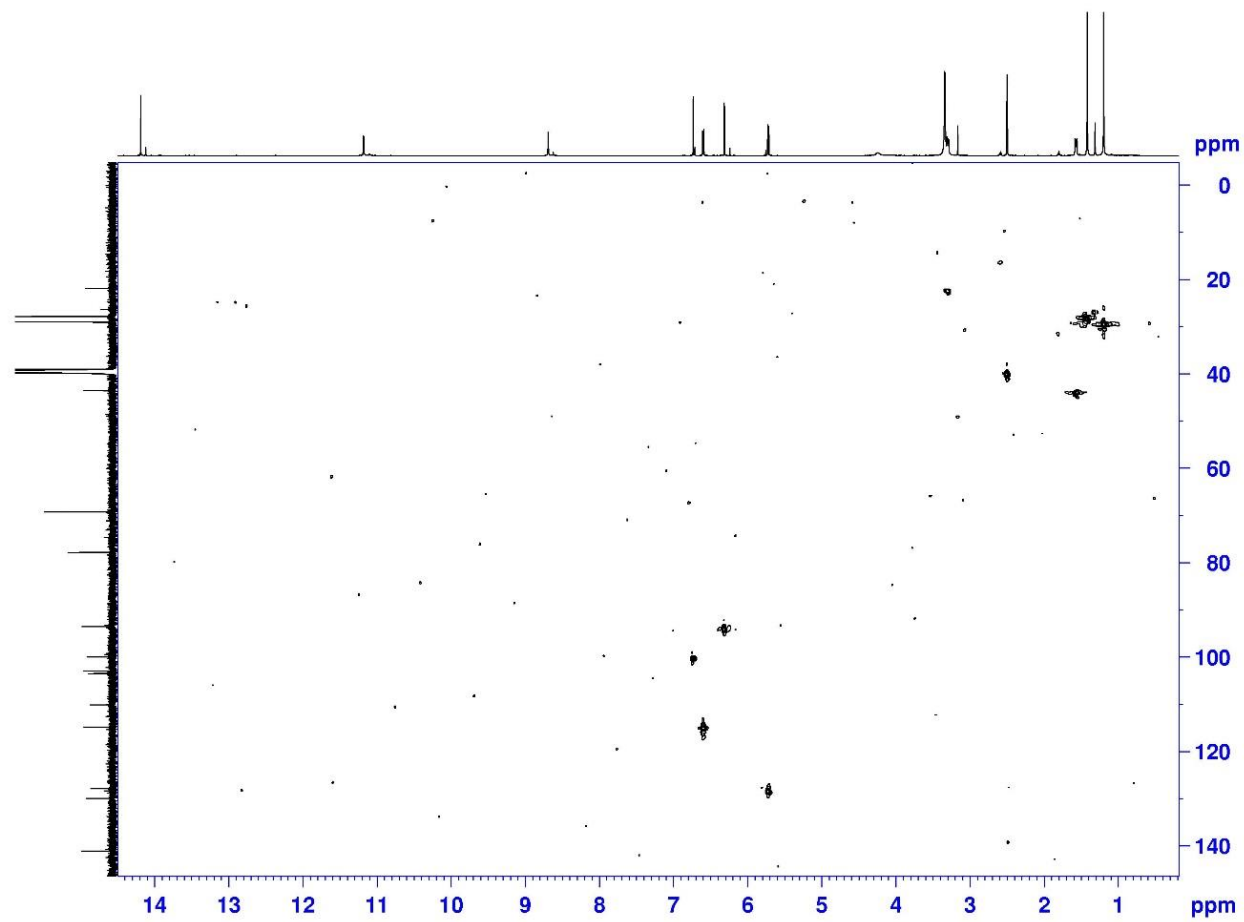

Figure S9. HSQC of compound 5.

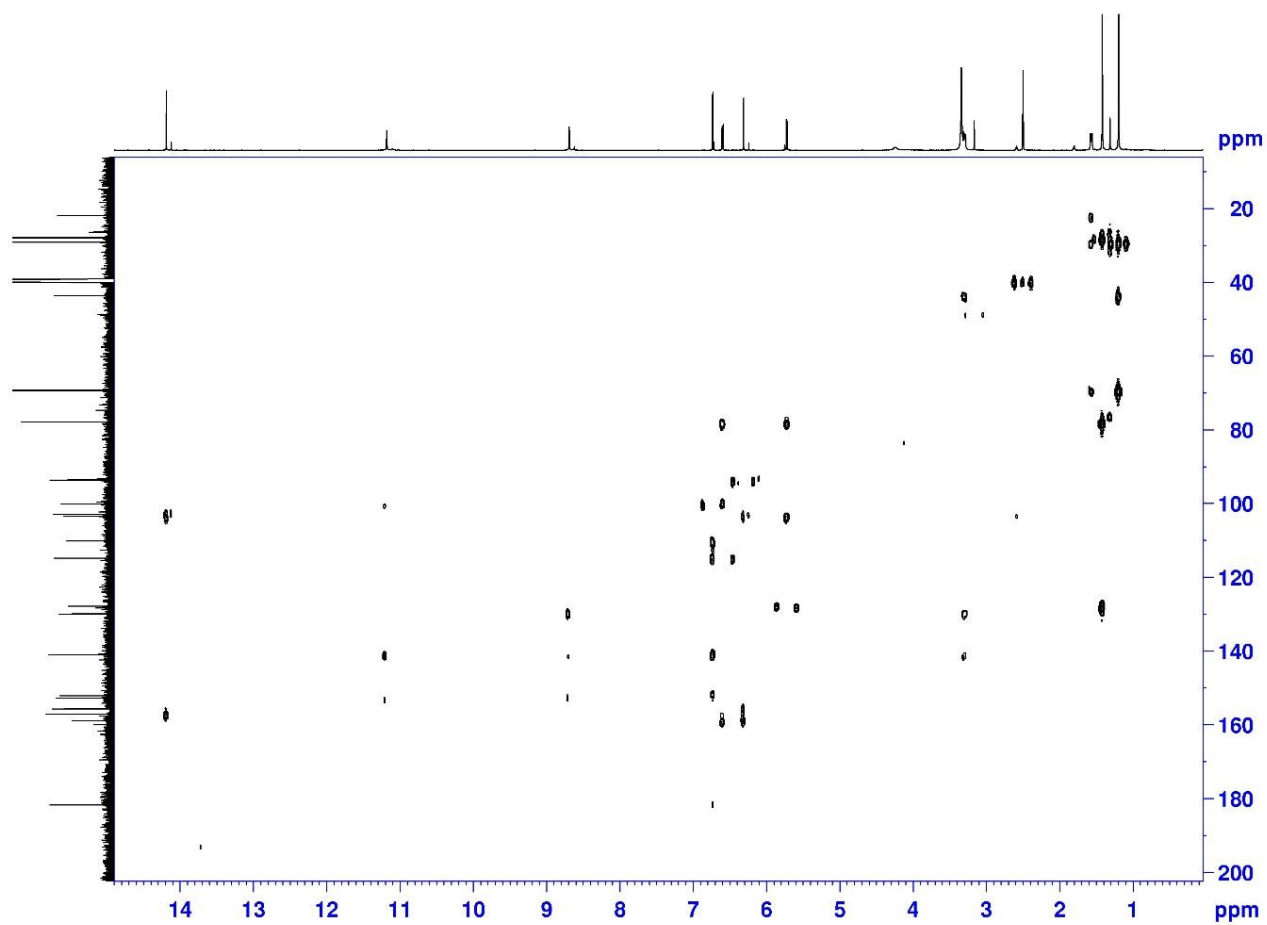

Figure S10. HMBC of compound 5.

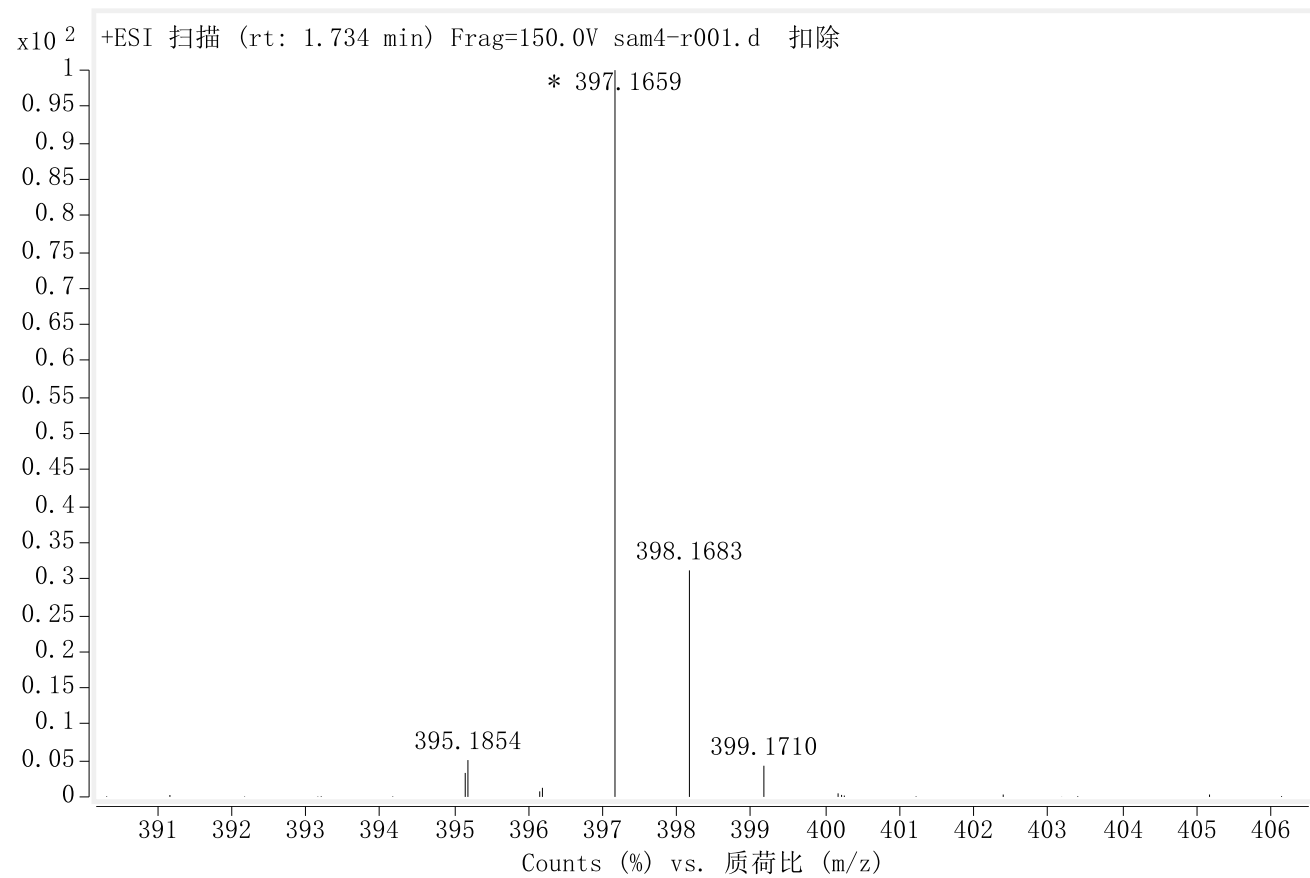

Figure S11. HR-MS of compound **6**

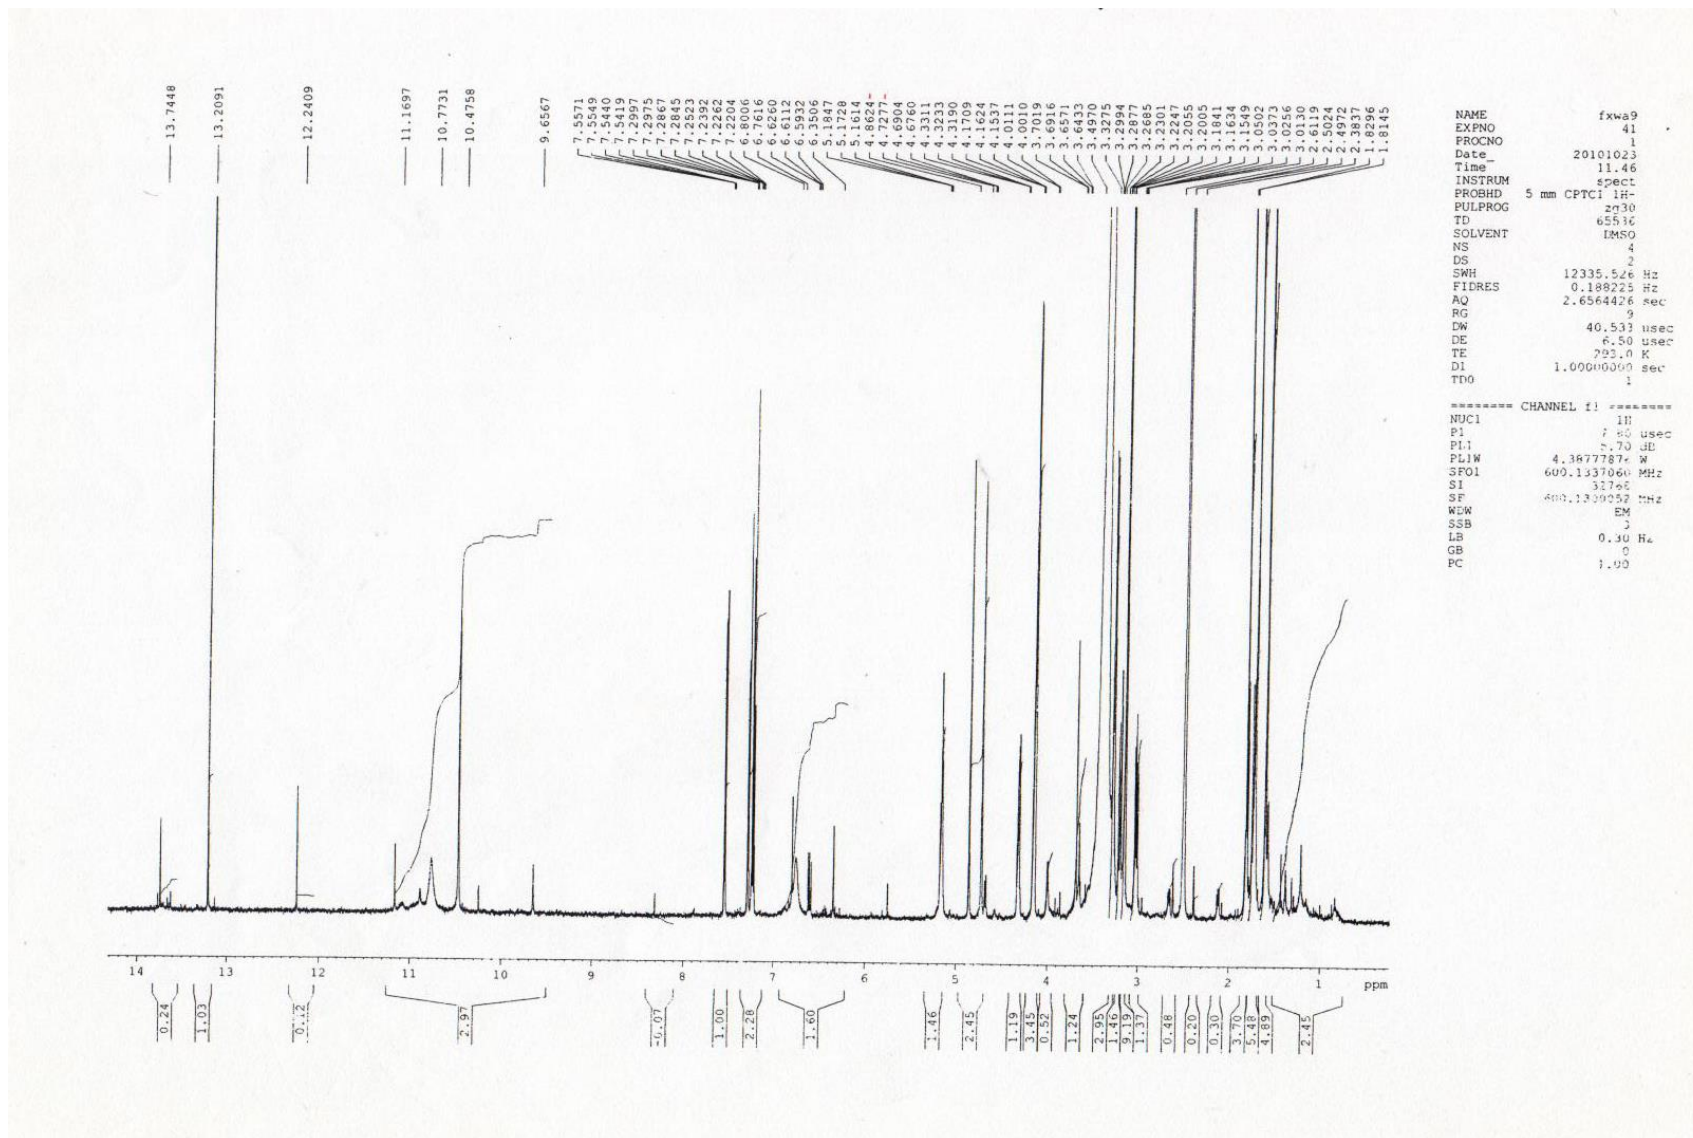

Figure S12. <sup>1</sup>H NMR of compound 6.

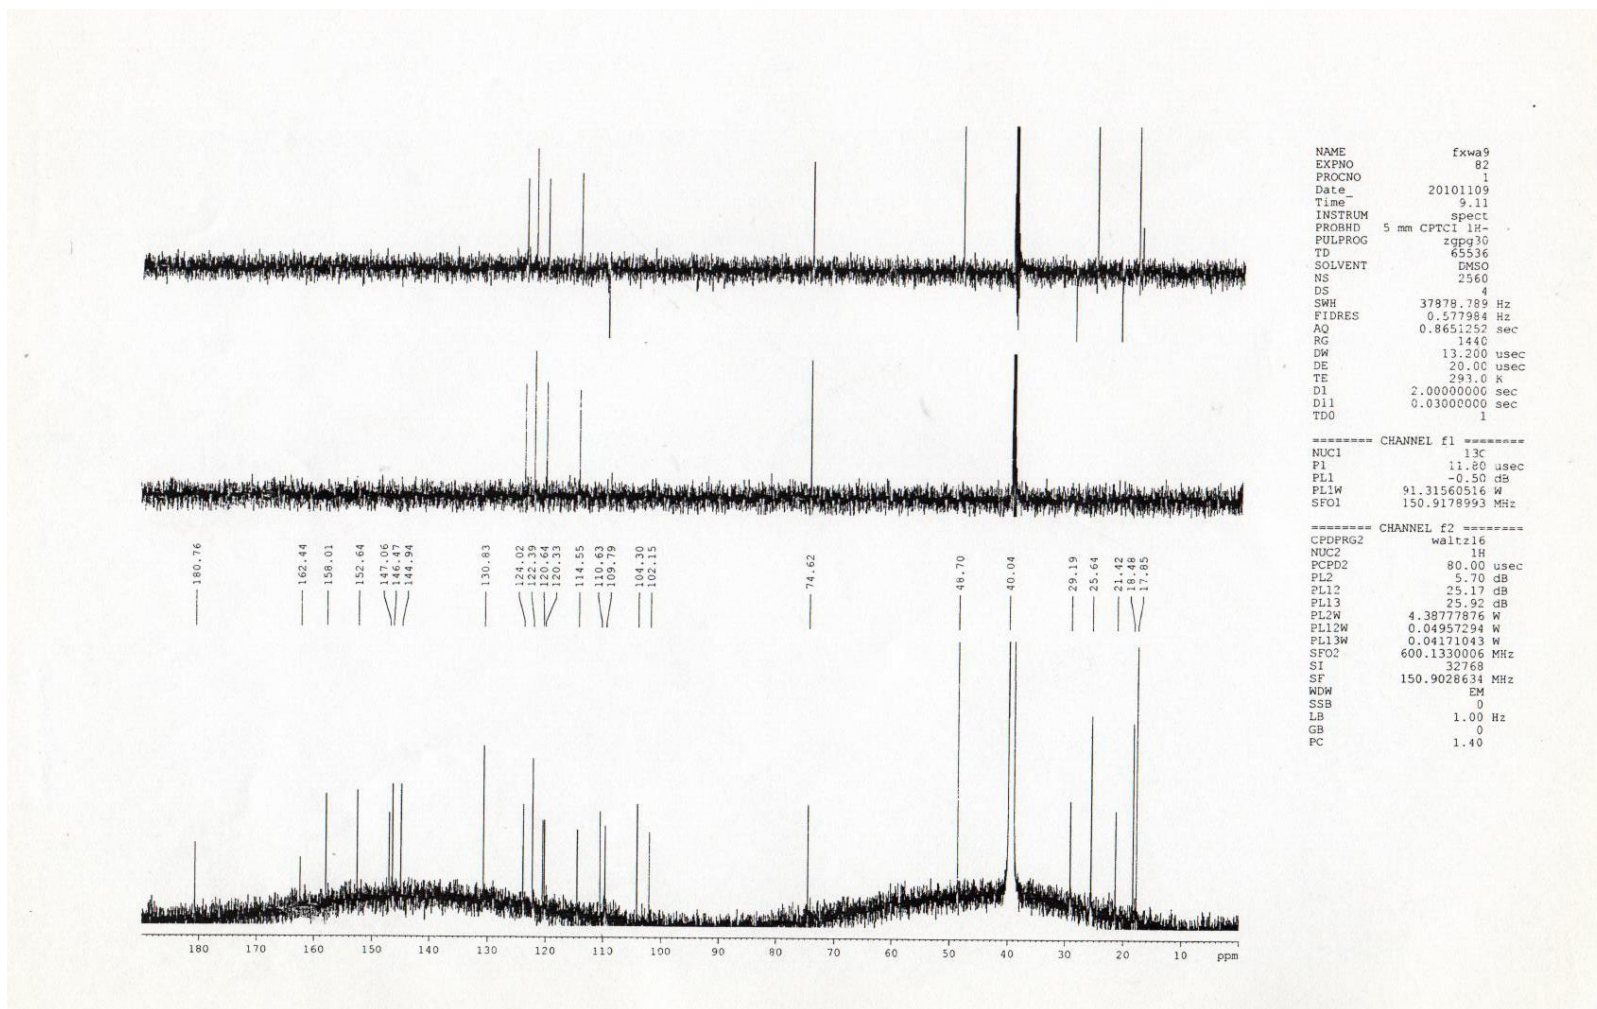

Figure S13. <sup>13</sup>C NMR of compound **6**.

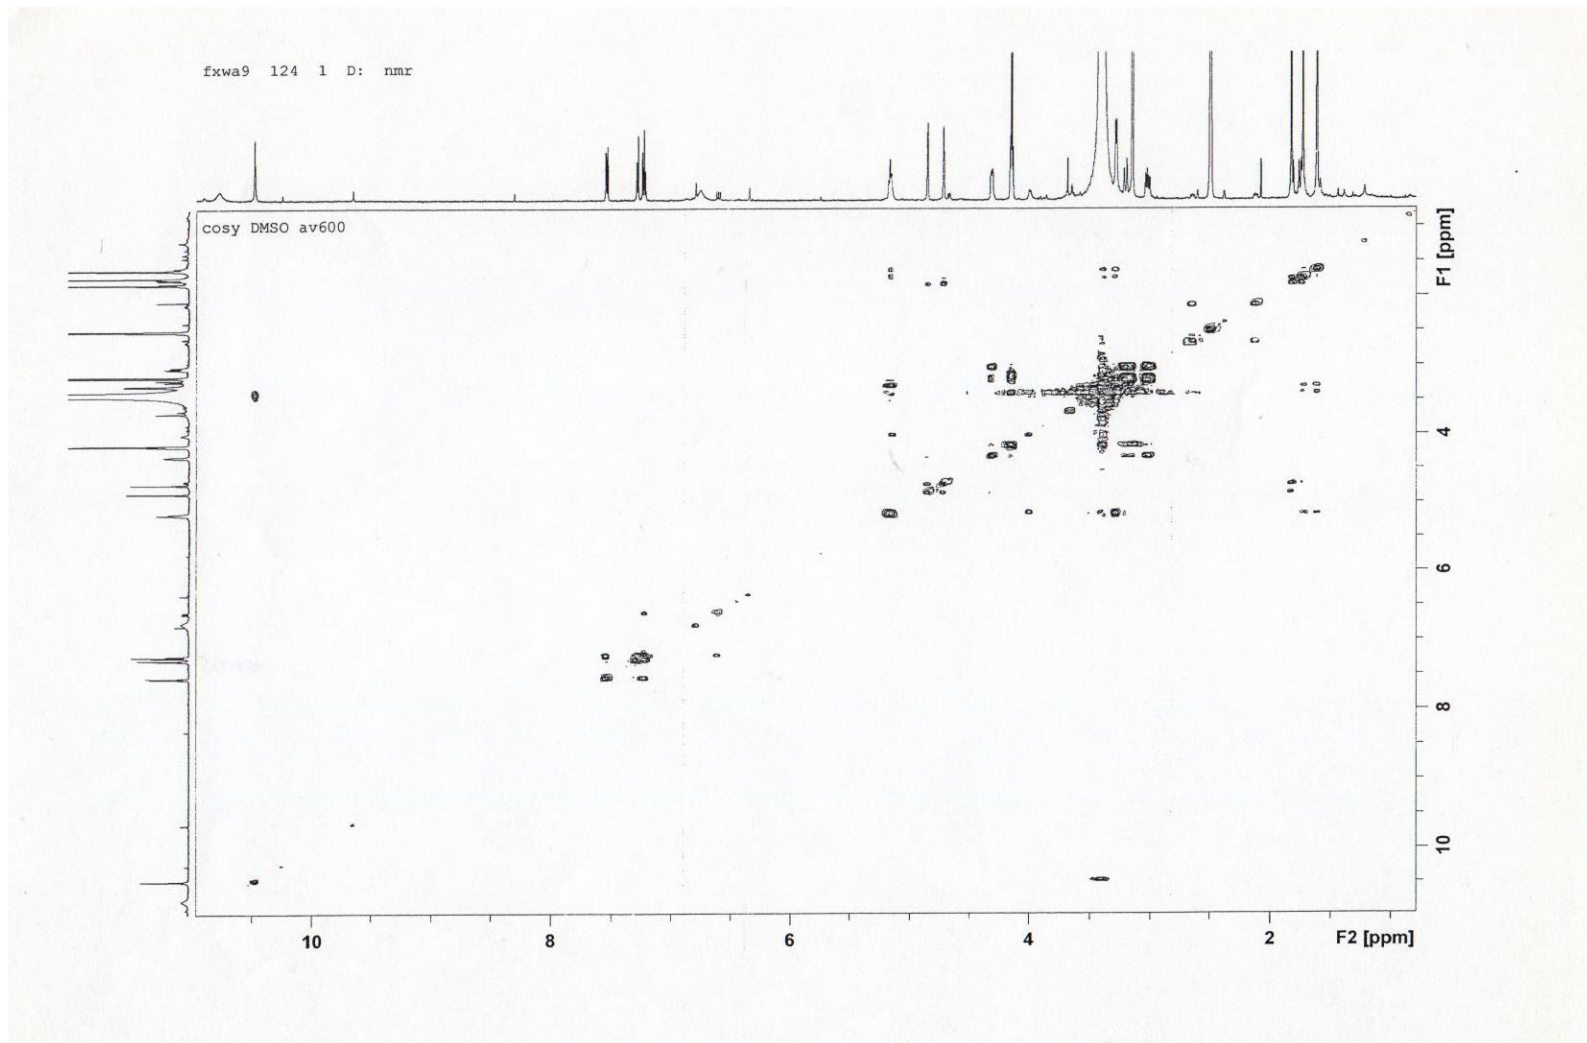

Figure S14.  $^1\text{H}$ - $^1\text{H}$  COSY of compound **6**.

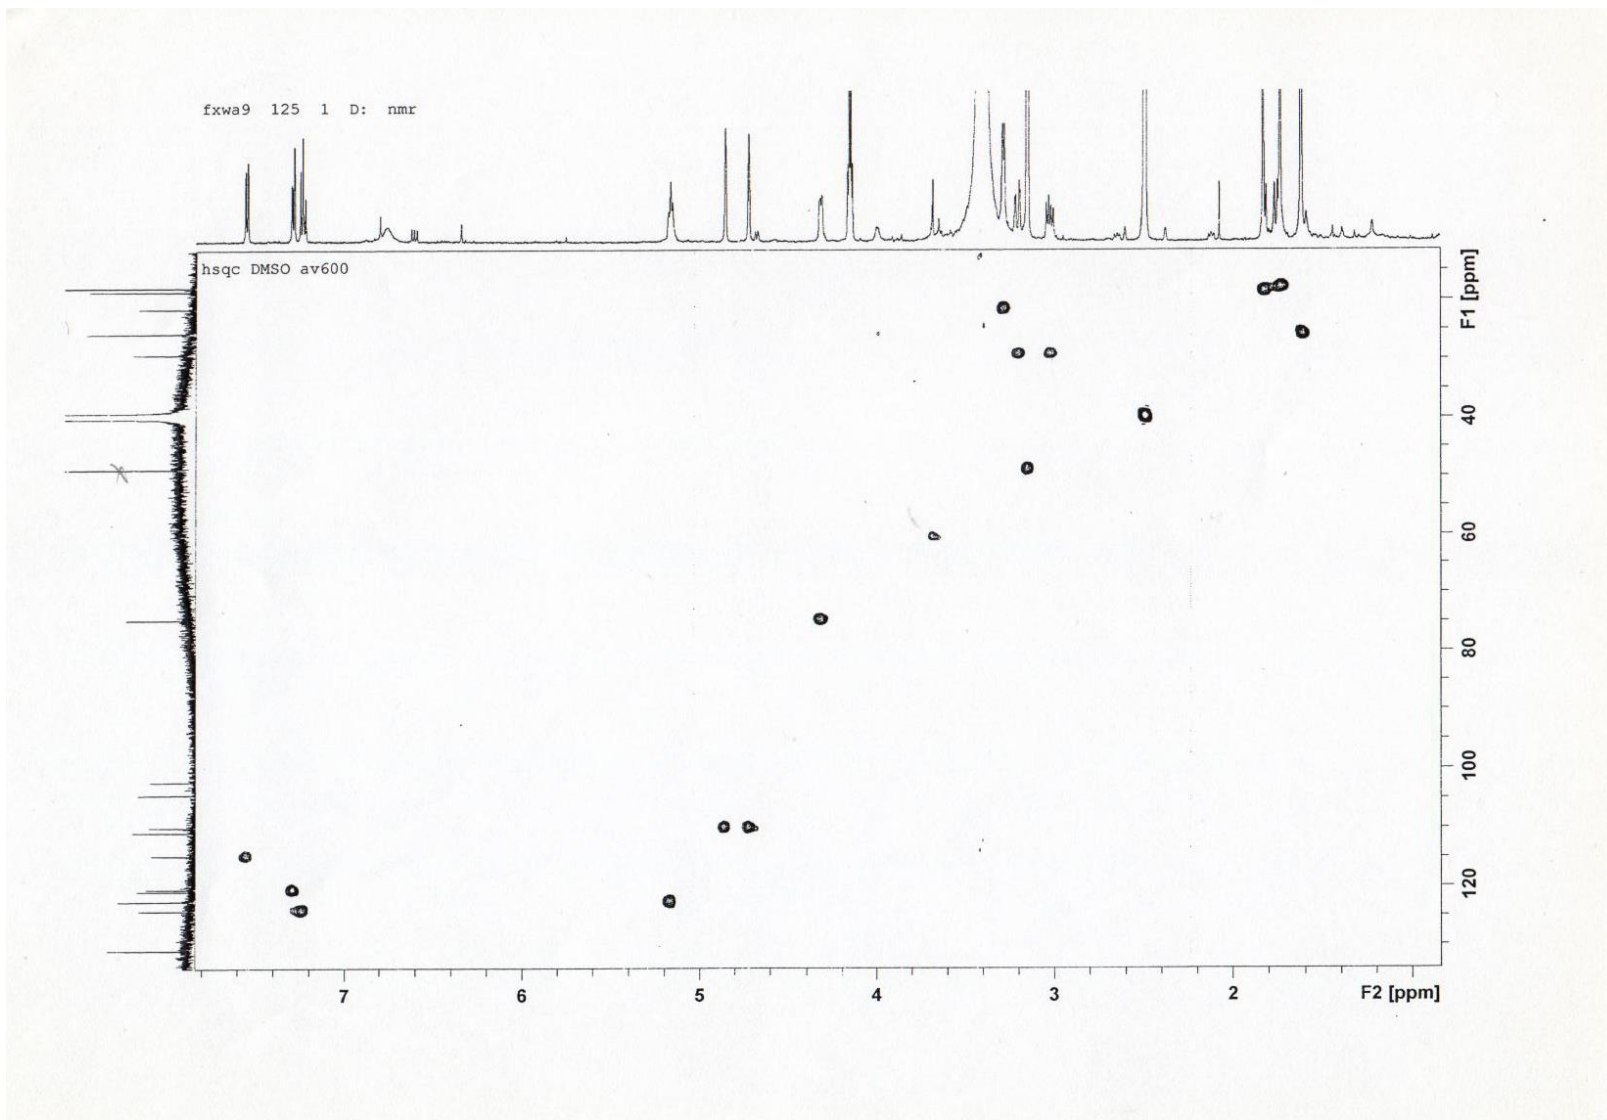

Figure S15. HSQC of compound **6**.



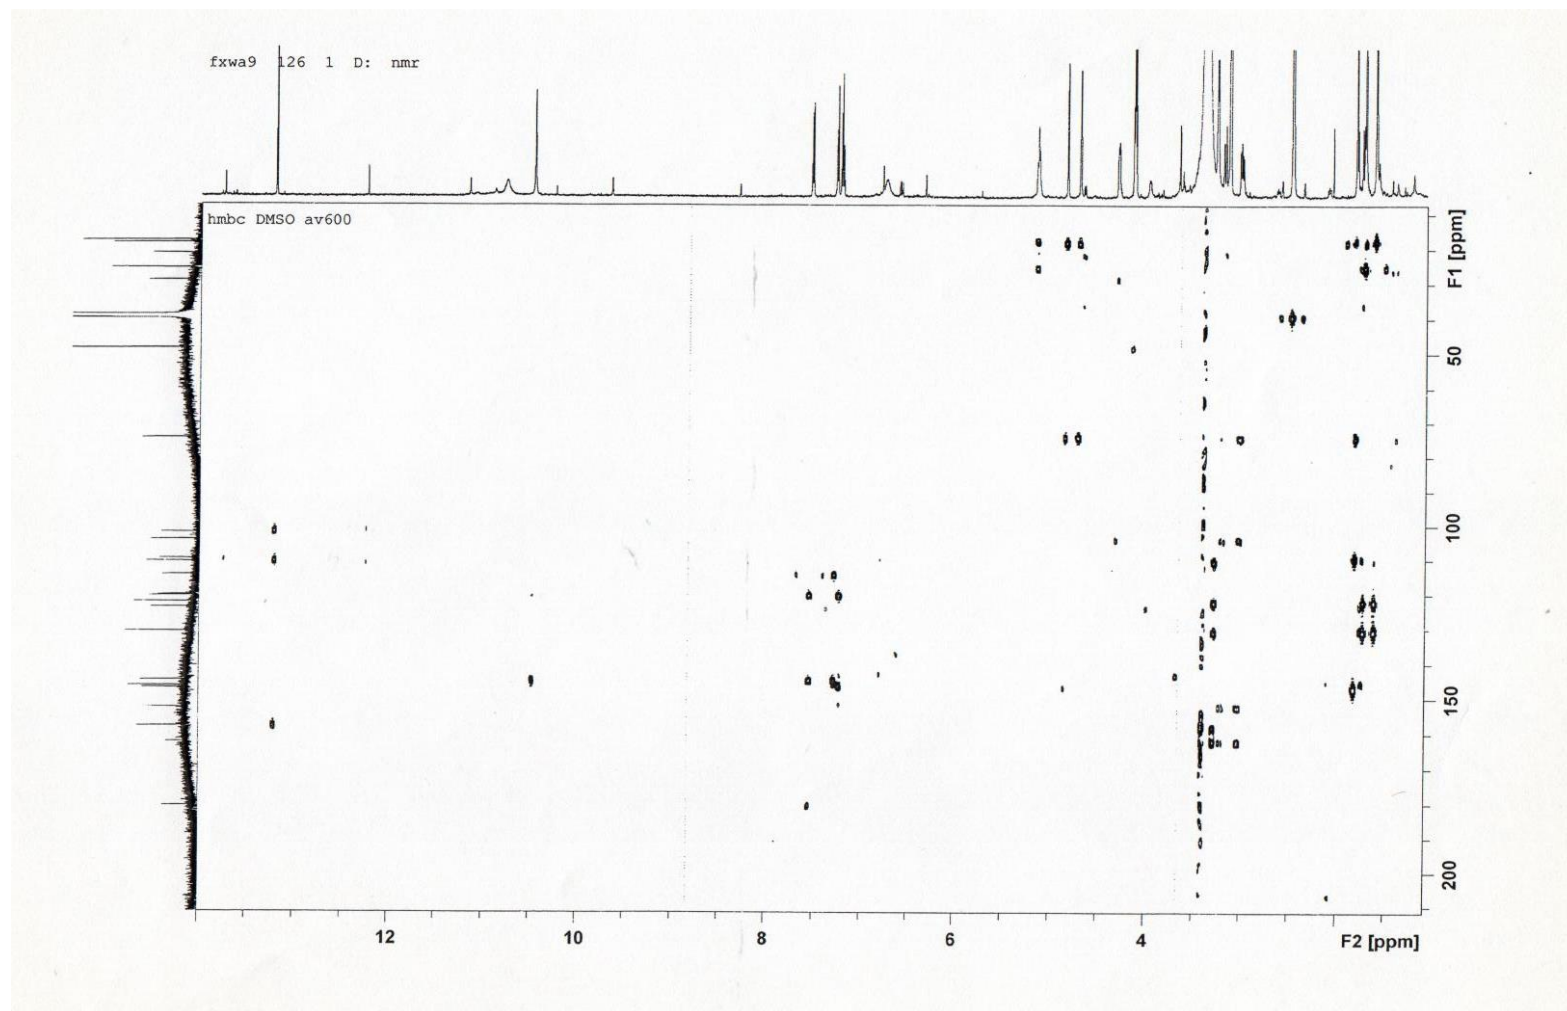

Figure S16. HMBC of compound 6.
